# Supplementary material for: A wide pH-range stable crystalline framework based on the largest tin-oxysulfide cluster [Sn20O10S34]
Source: Royal Society of Chemistry journal article supplement (doi:10.1039/c9cc05736f), 2019-01-01
Supplement: c9cc05736f1.pdf [file c9cc05736f1.pdf]

## Electronic Supporting Information for

# **Wide-pH-range stable crystalline framework based on the largest tin-oxysulfide cluster [Sn<sub>20</sub>O<sub>10</sub>S<sub>34</sub>]**

Shan-Lin Huang,<sup>a,b</sup> Liang He,<sup>a</sup> Er-Xia Chen,<sup>a</sup> Heng-Dong Lai,<sup>a</sup> Jian Zhang,<sup>\*,a</sup> and Qipu Lin<sup>\*,a</sup>

<sup>a</sup>*State Key Laboratory of Structural Chemistry Fujian Institute of Research on the Structure of Matter, Chinese Academy of Sciences, Fuzhou, Fujian 350002, China*

<sup>b</sup>*University of Chinese Academy of Sciences, Beijing 100049, China*

\*Corresponding Author: Email: [zhj@fjirsm.ac.cn](mailto:zhj@fjirsm.ac.cn); [linqipu@fjirsm.ac.cn](mailto:linqipu@fjirsm.ac.cn)

## **Table of Contents**

**Section S1:** General Methods

**Section S2:** Synthetic Procedures

**Section S3:** Crystallographic Data

**Section S4:** Structural Pictures

**Section S5:** Powder X-ray Diffraction (PXRD)

**Section S6:** Fourier-Transform Infrared (FT-IR) Spectroscopy

**Section S7:** Thermostability/Chemostability

**Section S8:** Photoluminescence (PL)

**Section S9:** Photocatalytic degradation

**Section S10:** References

---

## Section S1: General Methods

**Chemicals:** Tin tetrachloride ( $\text{SnCl}_4 \cdot 5\text{H}_2\text{O}$ , 99%, powder) was purchased from J&K, dimethylamine ( $\text{C}_2\text{H}_7\text{N}$ , 40% in water, liquid) was purchased from Aladdin, propylamine ( $\text{C}_3\text{H}_7\text{N}$ ,  $\geq 98\%$ , liquid) and diethylamine ( $\text{C}_4\text{H}_{11}\text{N}$ ,  $\geq 98\%$ , liquid) were purchased from Meryer, sulfur (S, 99.9%, powder), stannous chloride dihydrate ( $\text{SnCl}_2 \cdot 2\text{H}_2\text{O}$ , 99%, powder), ethanol ( $\text{C}_2\text{H}_6\text{O}$ , EtOH, 97%, liquid) and *N,N*-dimethylacetamide ( $\text{C}_4\text{H}_9\text{NO}$ , DMA, 97%, liquid) were purchased from Sinopharm. All chemical reagents were obtained from commercial supply without further purification.

**Instrumentation:** Elemental analysis (EA, with C/H/N) was carried out on a Vario EL-Cube. Powder X-ray diffraction (PXRD) patterns of the samples were recorded by a Rigaku Dmax 2500 X-ray diffractometer with Cu  $K\alpha$  radiation ( $\lambda = 1.54056 \text{ \AA}$ ). Thermal gravimetric analysis (TGA) was carried out on a Netzsch STA449F3 thermal analyzer at a temperature range of 25 to 800 °C under  $\text{N}_2$  atmosphere with a heating rate of 10 °C  $\text{min}^{-1}$ . Fourier-transform infrared (FT-IR) spectra were recorded using a Nicolet iS10 spectrophotometer in 3750~450  $\text{cm}^{-1}$  region. Scanning electron microscopy (SEM) and energy dispersive X-ray (EDX) spectroscopy images were obtained by a JSM-6700F.  $\text{N}_2$  adsorption-desorption isotherms were performed on a Micromeritics ASAP 2020 surface area and pore size analyzer. Ultraviolet-visible (UV-Vis) diffuse-reflectance spectra (DRS) were performed on a Shimadzu UV-1201PC spectrophotometer. Single crystals X-ray diffraction (SCXRD) data were collected on a SuperNova diffractometer by using Cu  $K\alpha$  radiation ( $\lambda = 1.54178 \text{ \AA}$ ). The structure was solved by direct method with SHELXT program and refined by full matrix least-squares (L.S.) methods with SHELXL program of SHELX-2014 package.<sup>[1]</sup> Mott-Schottky (MS) plots were measured on an IM 6 electrochemical system in 0.2 M  $\text{Na}_2\text{SO}_4$  electrolyte at room temperature with Ag/AgCl electrode as the reference electrode and Pt plate as the counter electrode, at the frequencies of 1500, 2000 and 2500 Hz. Before testing, the slurry was prepared by mixing 5 mg sample with 480  $\mu\text{L}$  ethanol and 20  $\mu\text{L}$  Nafion, then the working electrodes were prepared by depositing 10  $\mu\text{L}$  of the prepared slurry on the

---

surface of FTO glass plates. Photocurrent density was obtained in the presence of 0.2 M  $\text{Na}_2\text{SO}_4\text{-H}_2\text{O}$  using a three-electrode cell, consisting of an F-doped  $\text{SnO}_2$  (FTO) electrode coated with a thin layer of ground sample, a Pt-foil counter-electrode, and an Ag/AgCl reference electrode. Photocatalytic reactions were carried out in a quartz reactor with a water-cooling system. Prior to irradiation, the 3D-T4-SnOS/RhB suspension (30 mg of 3D-T4-SnOS in 50 mL of rhodamine B of  $0.202 \text{ mmol L}^{-1}$ ) was magnetically stirred for 1 hour and then stood for 10 hours in the dark to establish the adsorption/desorption equilibrium. Then, a 300 W Xe lamp with a 420 nm cut-off filter was used as illuminating source. At a regular interval of time (0.5 hour), 1 mL of reaction solution was extracted and filtrated to remove the solid-state species. The absorbance of the filtrated solution was measured by using UV-Vis spectroscopy. After reaction, the mixture was centrifuged and the powder was collected for the PXRD testing.

---

## Section S2: Synthetic Procedures

### (1) Synthesis of 3D-T4-SnOS

S powder (60 mg, 1.88 mmol),  $\text{SnCl}_2 \cdot 2\text{H}_2\text{O}$  (54 mg, 0.24 mmol),  $\text{SnCl}_4 \cdot 5\text{H}_2\text{O}$  (428 mg, 1.22 mmol), propylamine ( $\text{C}_3\text{H}_7\text{N}$ , 3.0 mL), *N,N*-dimethylacetamide ( $\text{C}_4\text{H}_9\text{NO}$ , 3.0 mL) and ethanol ( $\text{C}_2\text{H}_6\text{O}$ , 1.0 mL) were mixed in a 23 mL teflon-lined stainless autoclave and stirred for about 30 minutes. The vessel was sealed and heated at 160 °C for 7 days. After cooling to room temperature, yellow octahedral crystals of 3D-T4-SnOS were obtained after washing with DMA and EtOH to remove precipitates, and then dried in air (ca. 42% yield based on sulfur). EA data: C 11.52, H 2.12, N 3.04, S 22.95%, calculated for  $\text{C}_{48}\text{H}_{125}\text{N}_9\text{O}_{23}\text{S}_{32}\text{Sn}_{20}$  C 11.31, H 2.33, N 3.14, S 23.04%. IR:  $\nu$  ( $\text{cm}^{-1}$ ) = 2923 (w), 1610 (m), 1458 (w), 1395 (w), 1262 (w), 1115 (w), 1015 (w), 630 (s), 556 (w), 420 (w).

### (2) Synthesis of 2D-T3-SnOS (with the same $\text{T3-Sn}_{10}\text{O}_4\text{S}_{20}$ cluster and two-dimensional network as TMA-SnOS-SB3)<sup>[2]</sup>

S powder (110 mg, 3.44 mmol),  $\text{SnCl}_4 \cdot 5\text{H}_2\text{O}$  (383 mg, 1.09 mmol), dimethylamine ( $\text{C}_2\text{H}_7\text{N}$ , 2.0 mL) and diethylamine ( $\text{C}_4\text{H}_{11}\text{N}$ , 4.0 mL) were mixed in a 23 mL teflon-lined stainless autoclave and stirred for about 30 minutes. The vessel was sealed and heated at 180 °C for 8 days. After cooling to room temperature, pale-yellow octahedral crystals of 2D-T3-SnOS were obtained after washing with EtOH to remove precipitate, and then dried in air (ca. 27% yield based on sulfur). IR:  $\nu$  ( $\text{cm}^{-1}$ ) = 3490 (w), 3046 (m), 2974 (m), 2762 (w), 1569 (w), 1442 (m), 1383 (w), 1053 (w), 1020 (w), 773(w), 570 (s).

---

## Section S3: Crystallographic Data

**Table S1** Crystallographic data of 3D-T4-SnOS

| Compound Reference                          | 3D-T4-SnOS                                                                                                                                           |
|---------------------------------------------|------------------------------------------------------------------------------------------------------------------------------------------------------|
| Chemical Formula                            | $(\text{C}_3\text{H}_8\text{N})_4[\text{Sn}_{20}\text{O}_{10}\text{S}_{32}] \cdot (\text{C}_4\text{H}_9\text{NO})_5(\text{C}_2\text{H}_6\text{O})_8$ |
| Formula Mass                                | 4604.35                                                                                                                                              |
| Crystal System                              | Tetragonal                                                                                                                                           |
| $a/\text{\AA}$                              | 23.5105(5)                                                                                                                                           |
| $b/\text{\AA}$                              | 23.5105(5)                                                                                                                                           |
| $c/\text{\AA}$                              | 40.205(3)                                                                                                                                            |
| $\alpha/^\circ$                             | 90                                                                                                                                                   |
| $\beta/^\circ$                              | 90                                                                                                                                                   |
| $\gamma/^\circ$                             | 90                                                                                                                                                   |
| Unit-Cell Volume/ $\text{\AA}^3$            | 22223(2)                                                                                                                                             |
| Temperature/K                               | 293(2)                                                                                                                                               |
| Space Group                                 | $I4_1/acd$                                                                                                                                           |
| No. of Formula Units Per Unit-Cell, $Z$     | 8                                                                                                                                                    |
| No. of Reflections Measured                 | 20736                                                                                                                                                |
| No. of Independent Reflections              | 5597                                                                                                                                                 |
| $R_{int}$                                   | 0.0384                                                                                                                                               |
| Final $R_1$ Values ( $I > 2\sigma(I)$ )     | 0.0410                                                                                                                                               |
| Final $wR(F^2)$ Values ( $I > 2\sigma(I)$ ) | 0.1077                                                                                                                                               |
| Final $R_1$ Values (all data)               | 0.0539                                                                                                                                               |
| Final $wR(F^2)$ Values (all data)           | 0.1173                                                                                                                                               |
| Goodness of Fit on $F^2$                    | 1.012                                                                                                                                                |
| CCDC Number                                 | 1909342                                                                                                                                              |

---

## Section S4: Structural Pictures

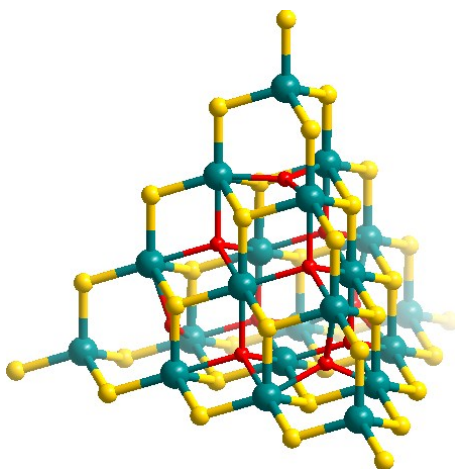

**Fig. S1** Supertetrahedral filled-T4 “[ $\text{Sn}_{20}\text{O}_{10}\text{S}_{34}$ ]” cluster with the missing of the central sulfide anion of 3D-T4-SnOS.

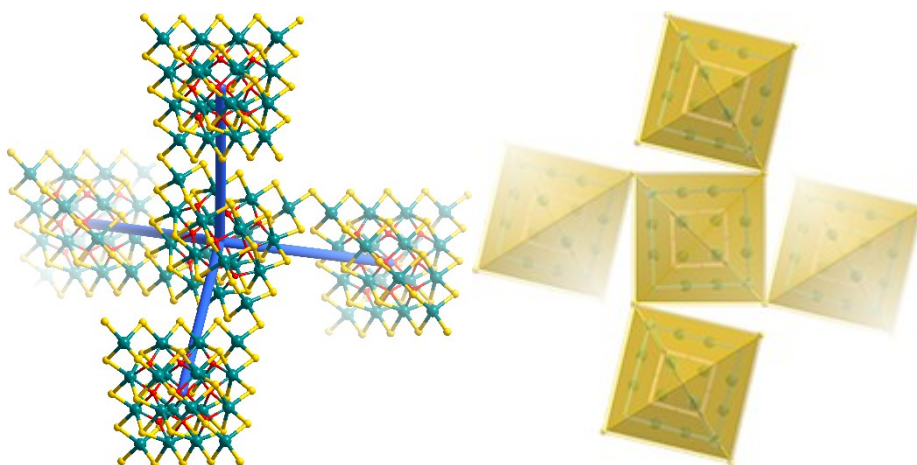

**Fig. S2** Linkage mode between filled-T4 “[ $\text{Sn}_{20}\text{O}_{10}\text{S}_{34}$ ]” clusters, each of which connects to four neighbors via four  $\mu_2\text{-S}^{2-}$ -linkers of 3D-T4-SnOS.

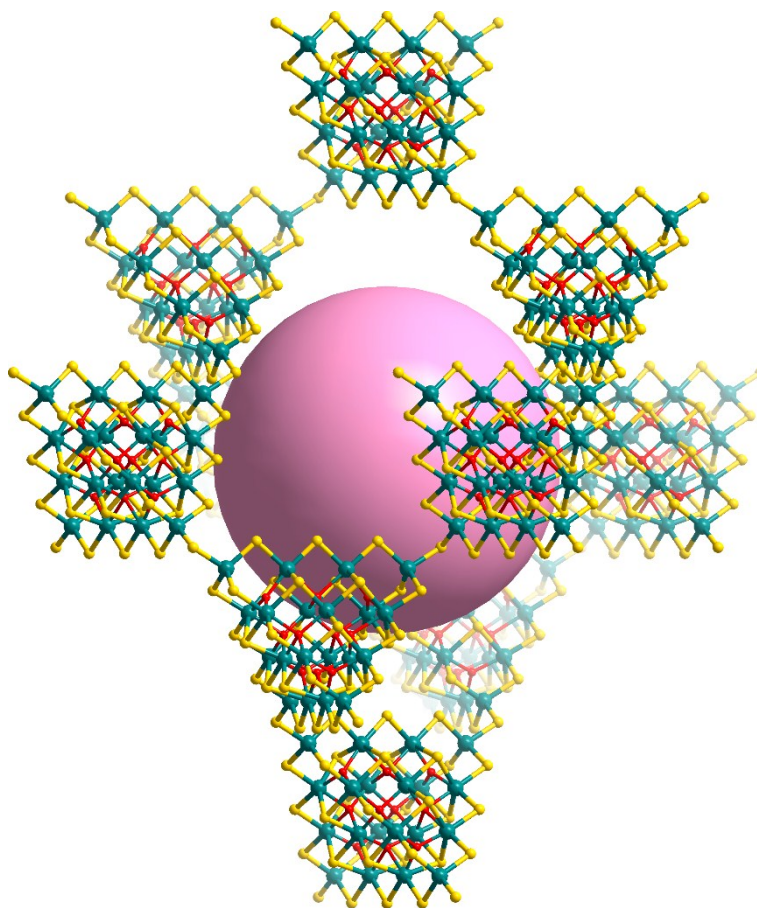

**Fig. S3** Adamantane cage surrounded by 10 supertetrahedral filled-T4-“ $[\text{Sn}_{20}\text{O}_{10}\text{S}_{34}]$ ” clusters of 3D-T4-SnOS.



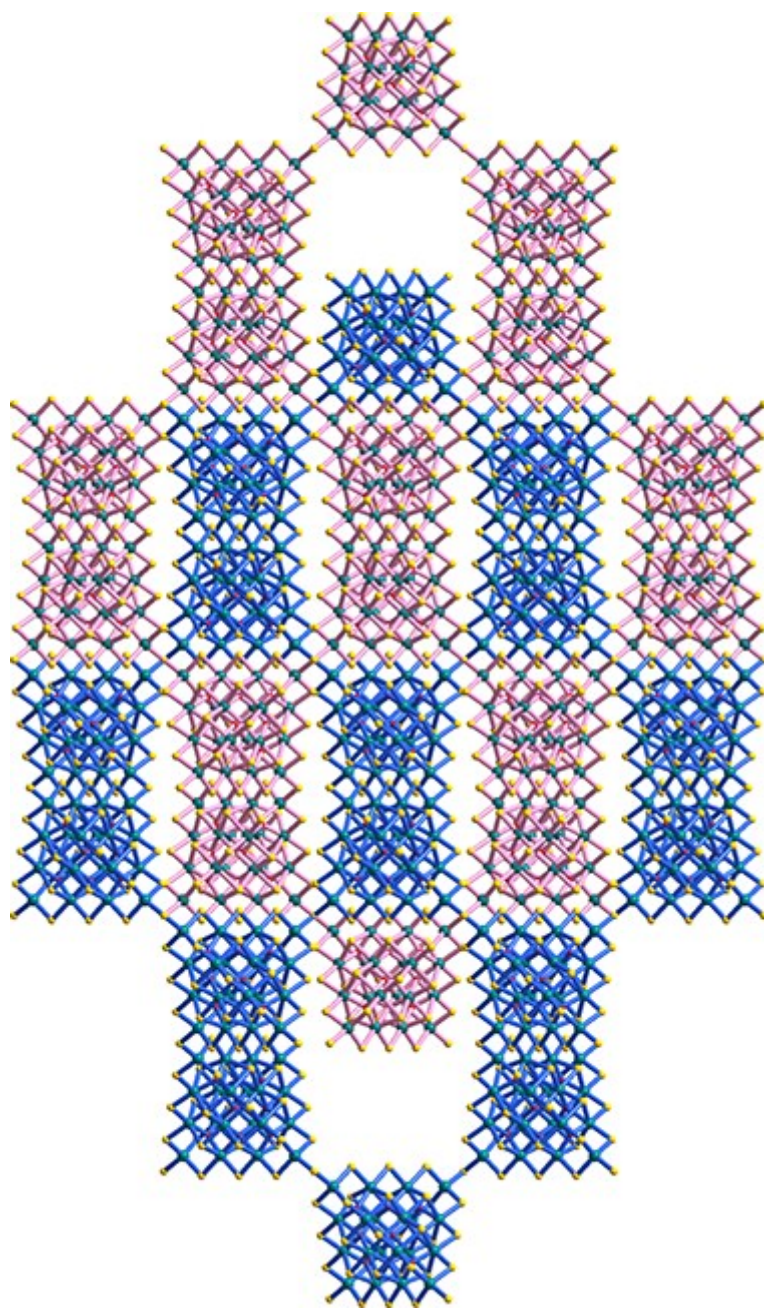

**Fig. S4** Two-interpenetrated **dia**-typed framework of 3D-T4-SnOS in ball-stick fashion.

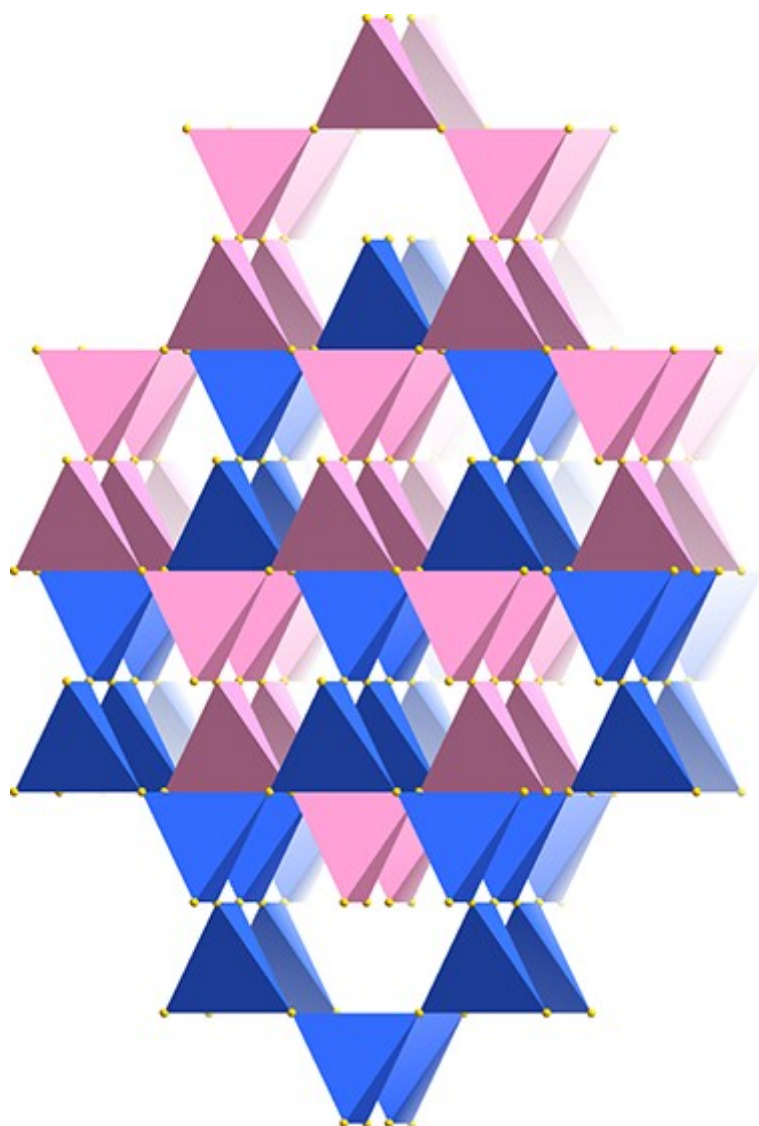

**Fig. S5** Polyhedral scheme of two-interpenetrated **dia**-network of 3D-T4-SnOS.

---

## Section S5: Powder X-ray Diffraction (PXRD)

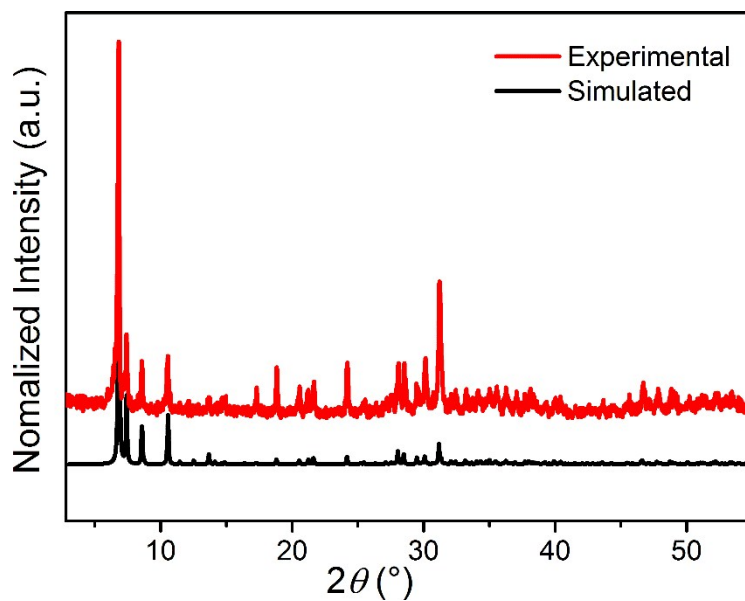

**Fig. S6** Experimental and simulated PXRD patterns of 3D-T4-SnOS.

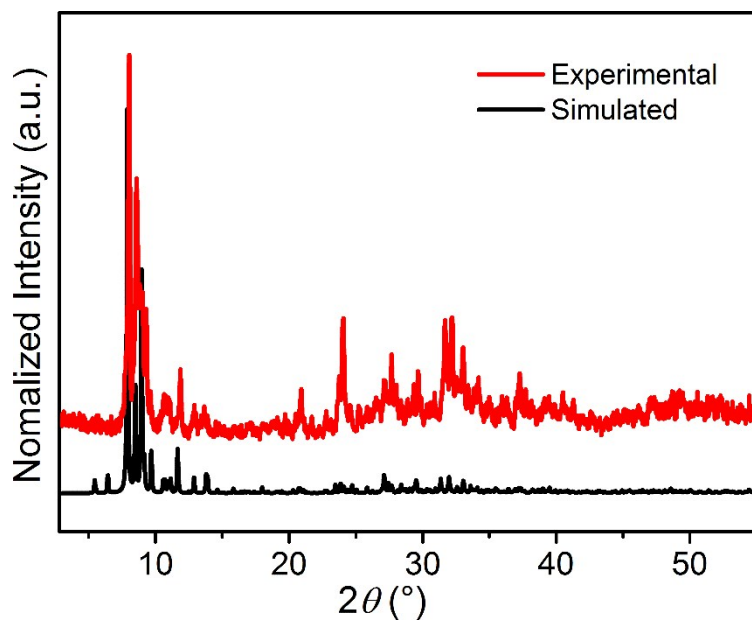

**Fig. S7** Experimental and simulated PXRD patterns of 2D-T3-SnOS.

## Section S6: Fourier-Transform Infrared Spectroscopy (FT-IR)

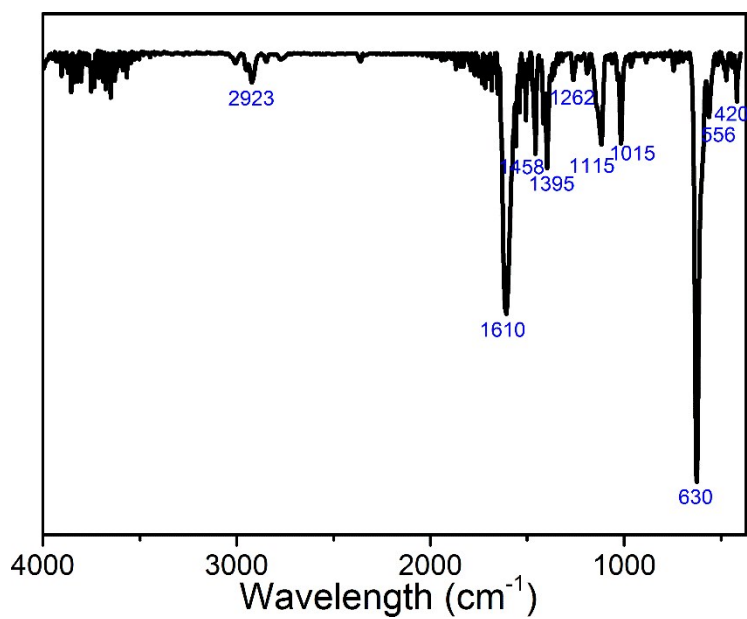

**Fig. S8** FT-IR spectrum of 3D-T4-SnOS.

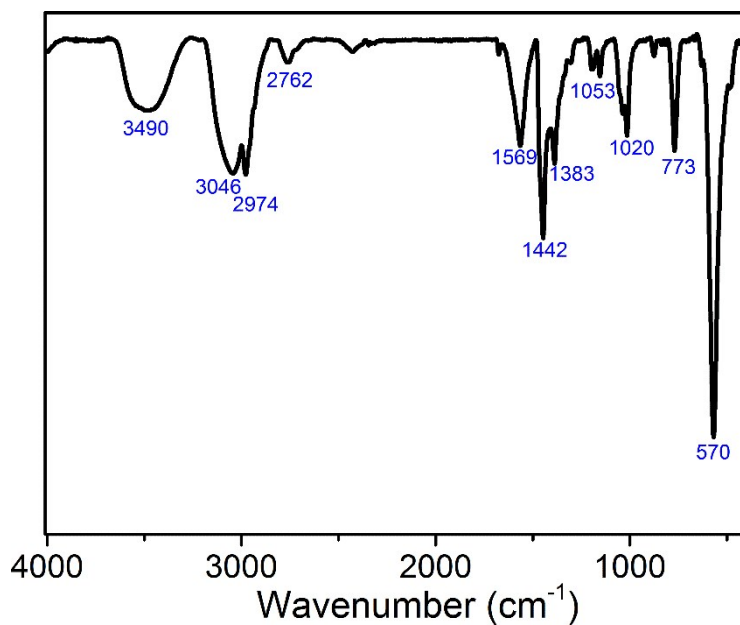

**Fig. S9** FT-IR spectrum of 2D-T3-SnOS.

## Section S7: Thermostability/Chemostability

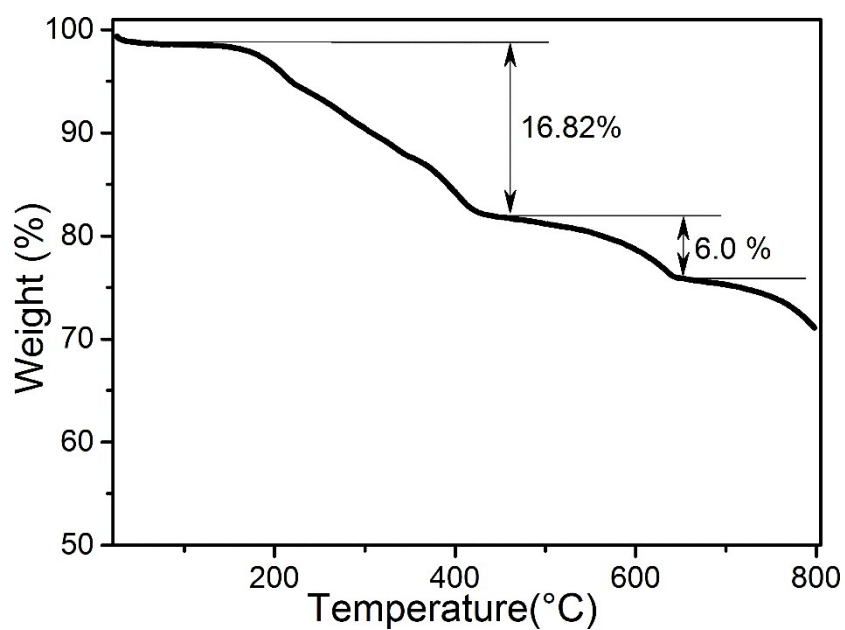

**Fig. S10** TGA curve of 3D-T4-SnOS under N<sub>2</sub> atmosphere.

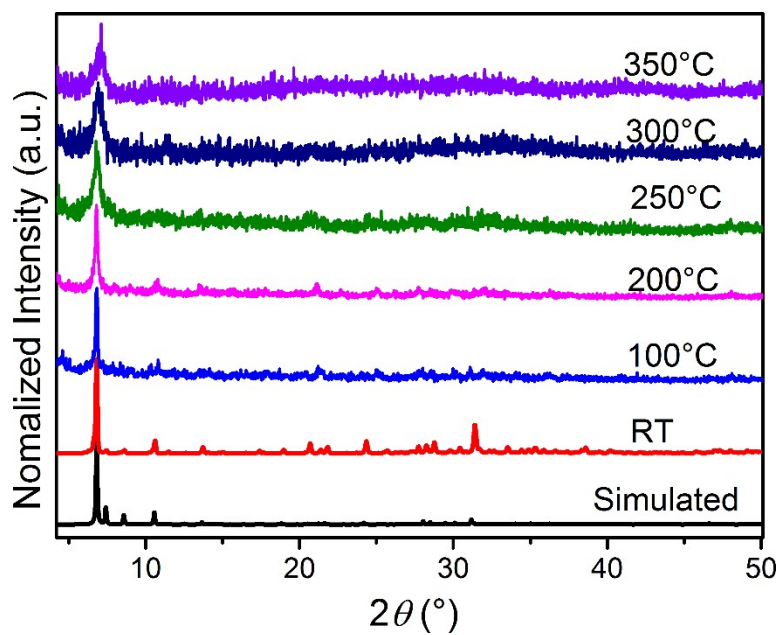

**Fig. S11** Temperature-dependent PXRD patterns of 3D-T4-SnOS under N<sub>2</sub> atmosphere.

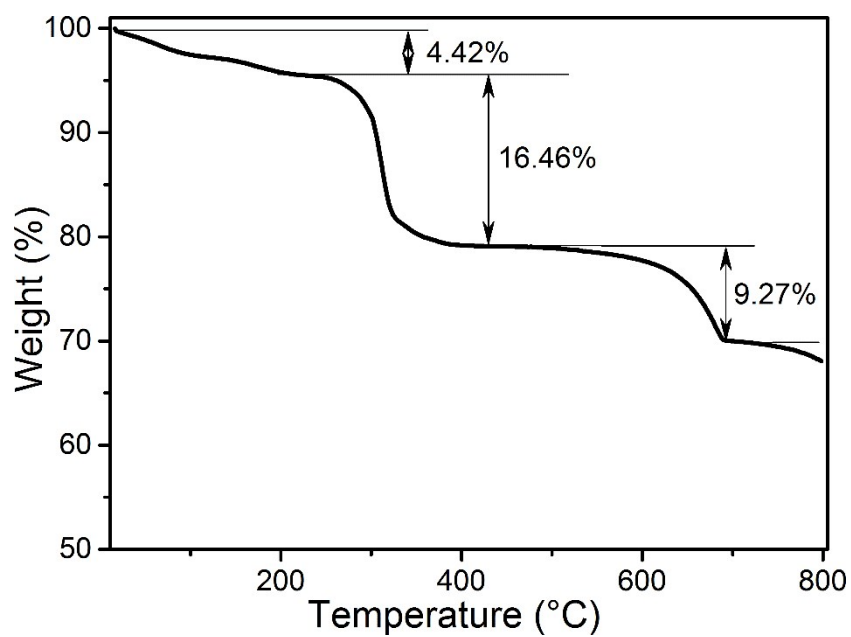

**Fig. S12** TGA curve of 2D-T3-SnOS under N<sub>2</sub> atmosphere.

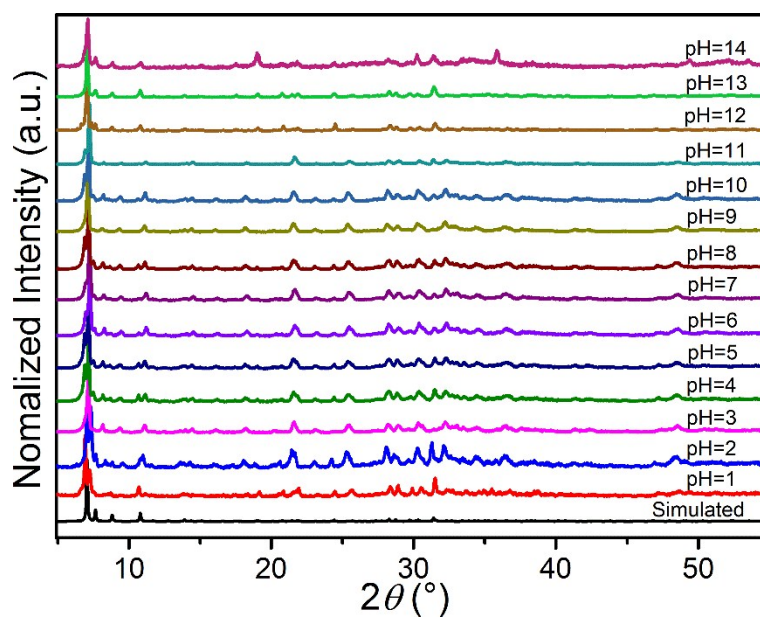

**Fig. S13** PXRD patterns of 3D-T4-SnOS after immersion in aqueous solution with pH of 1~14 for 7 days.



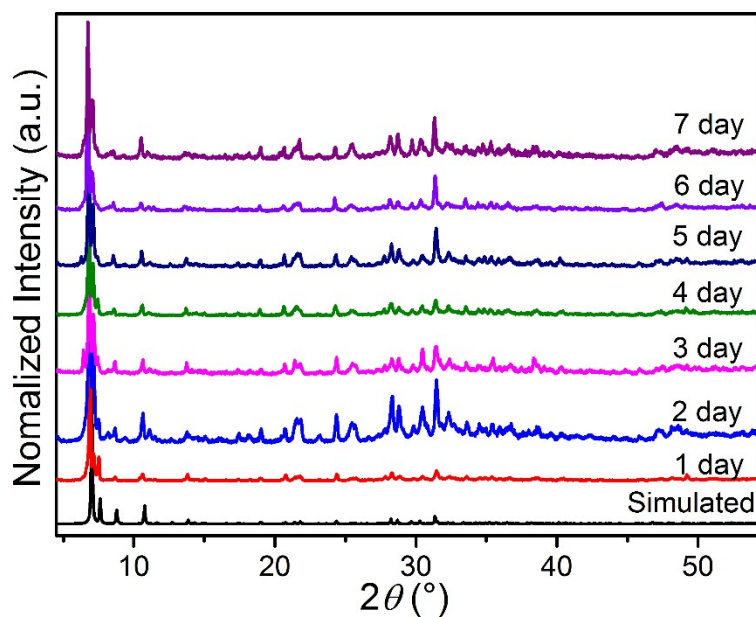

**Fig. S14** PXRD patterns of 3D-T4-SnOS after immersion in pH = 1 aqueous solution for 1~7 days.

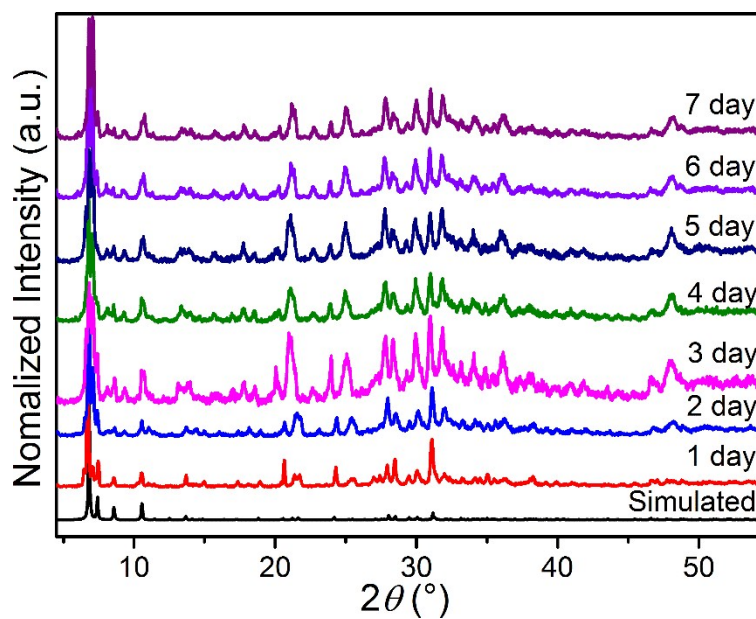

**Fig. S15** PXRD patterns of 3D-T4-SnOS after immersion in pH = 2 aqueous solution for 1~7 days.

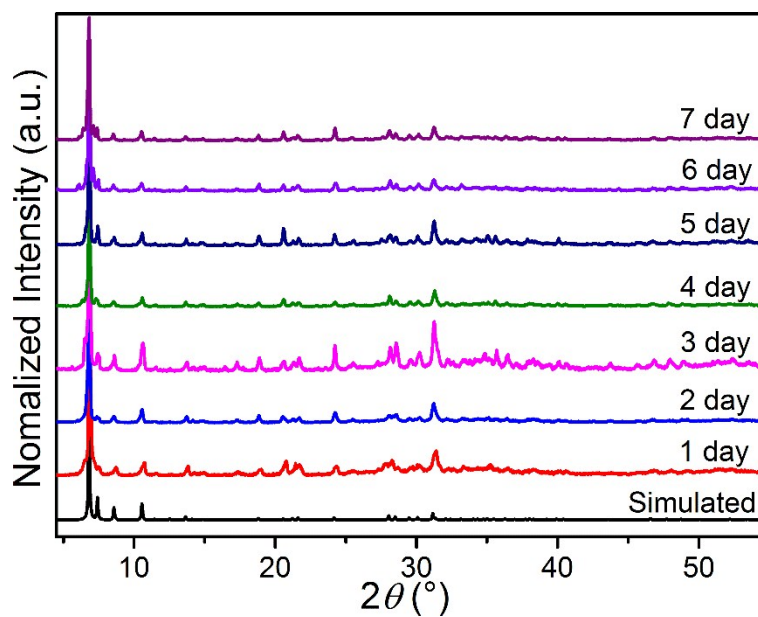

**Fig. S16** PXRD patterns of 3D-T4-SnOS after immersion in pH = 12 aqueous solution for 1~7 days.

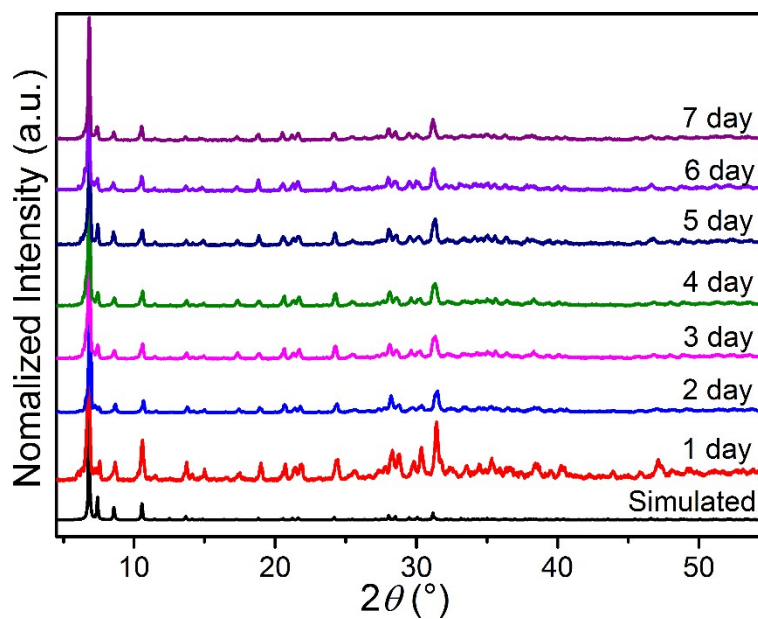

**Fig. S17** PXRD patterns of 3D-T4-SnOS after immersion in pH = 13 aqueous solution for 1~7 days.



## Section S8: Photoluminescence (PL)

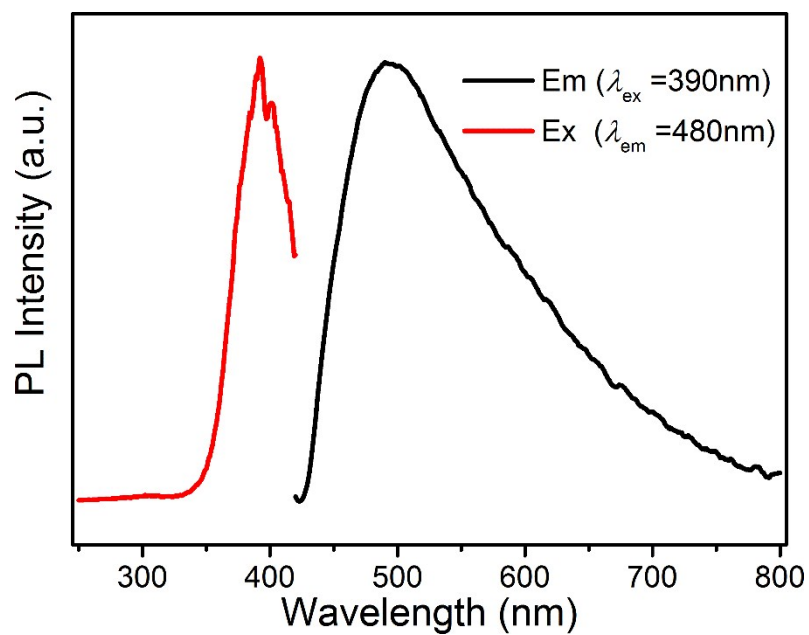

**Fig. S18** PL excitation ( $\lambda_{em} = 490$  nm) and emission ( $\lambda_{ex} = 391$  nm) spectra of 3D-T4-SnOS at room temperature.

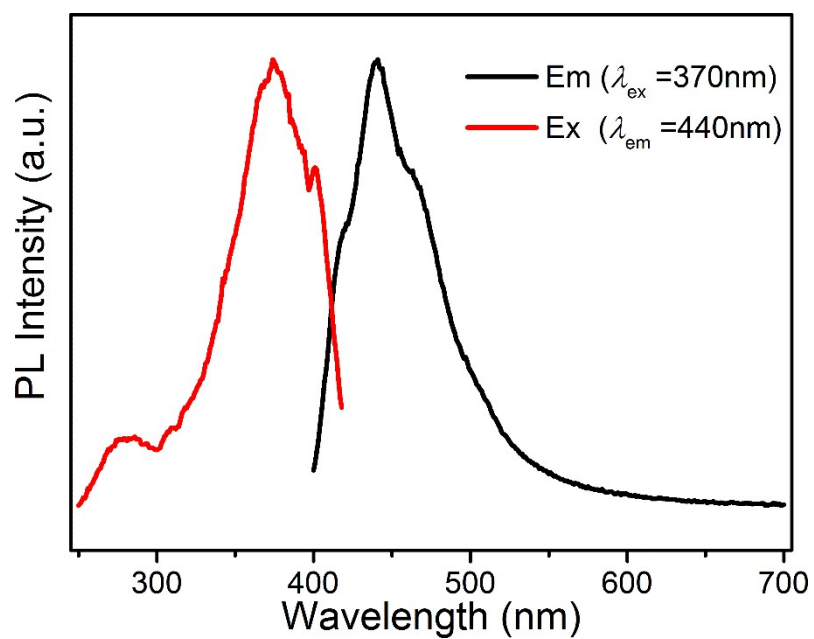

**Fig. S19** PL excitation ( $\lambda_{em} = 440$  nm) and emission ( $\lambda_{ex} = 375$  nm) spectra of 2D-T3-SnOS at room temperature.

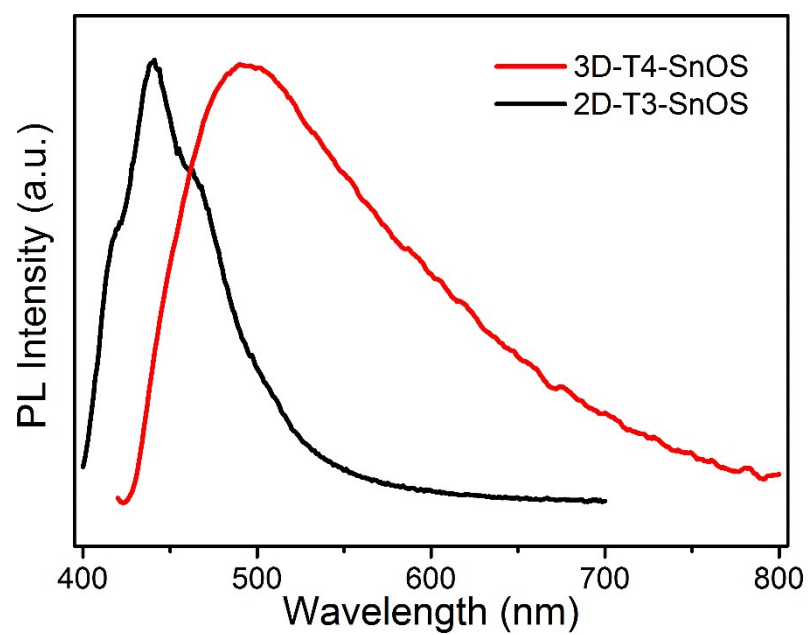

**Fig. S20** PL emission spectra of 3D-T4-SnOS ( $\lambda_{\text{ex}} = 391$  nm) and 2D-T3-SnOS ( $\lambda_{\text{ex}} = 375$  nm) at room temperature.

## Section S9: Photocatalytic degradation

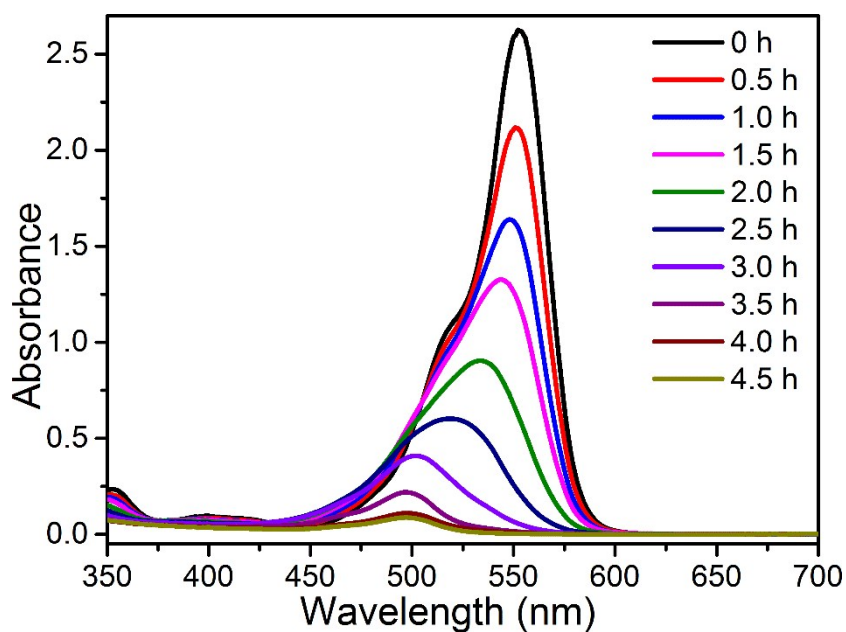

**Fig. S21** UV-Vis absorption spectra during the photodegradation of rhodamine B in aqueous solution (pH = 7) over 3D-T4-SnOS under visible light irradiation.

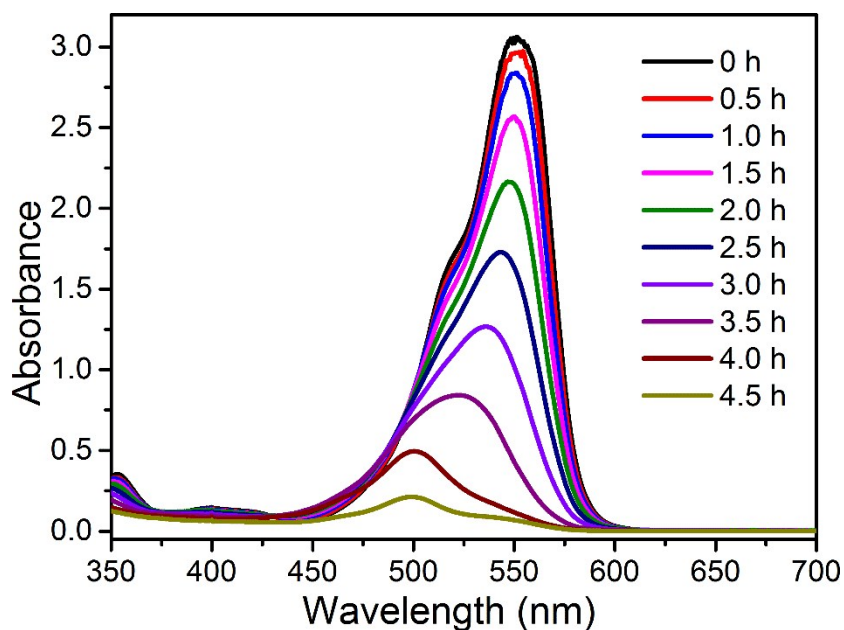

**Fig. S22** UV-Vis absorption spectra during the photodegradation of rhodamine B in aqueous solution (pH = 5) over 3D-T4-SnOS under visible light irradiation.

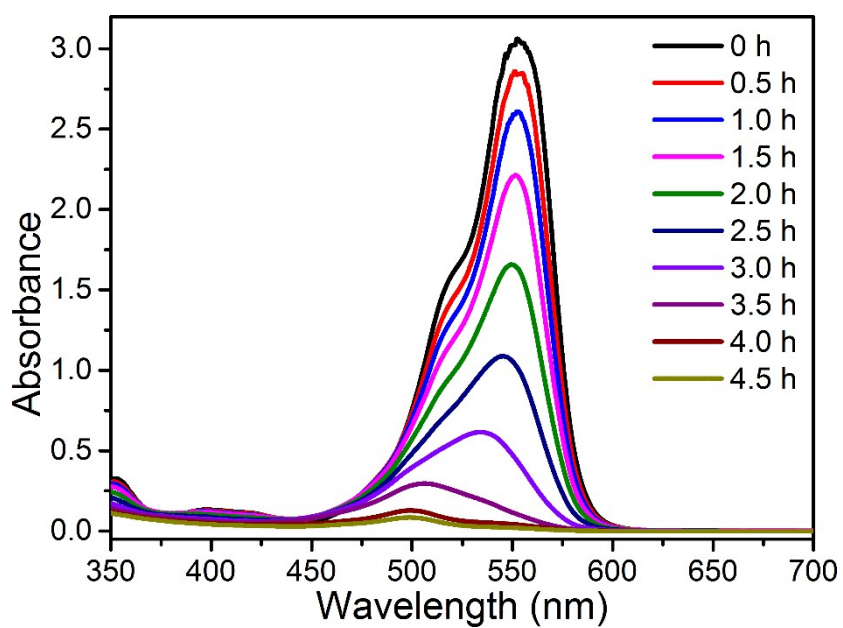

**Fig. S23** UV-Vis absorption spectra during the photodegradation of rhodamine B in aqueous solution (pH = 3) over 3D-T4-SnOS under visible light irradiation.

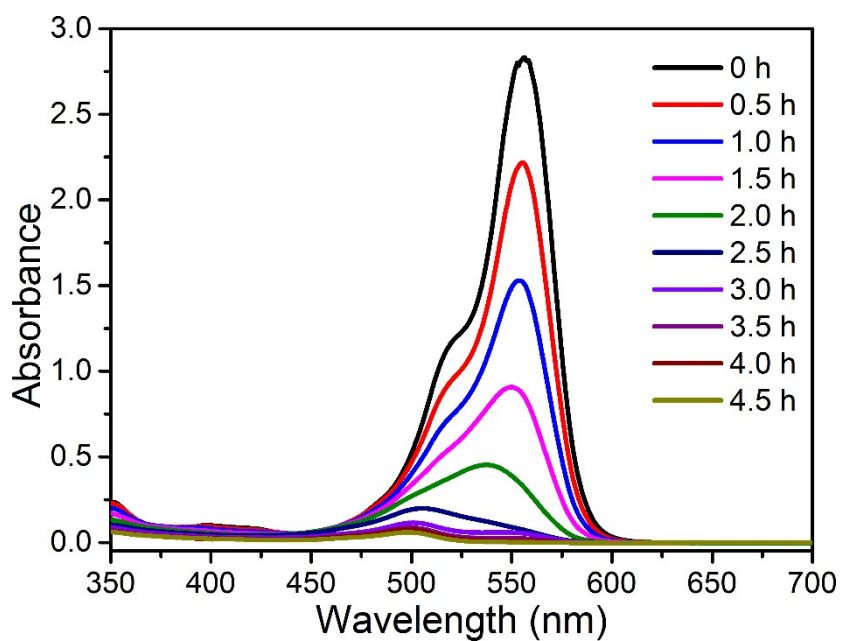

**Fig. S24** UV-Vis absorption spectra during the photodegradation of rhodamine B in aqueous solution (pH = 2) over 3D-T4-SnOS under visible light irradiation.

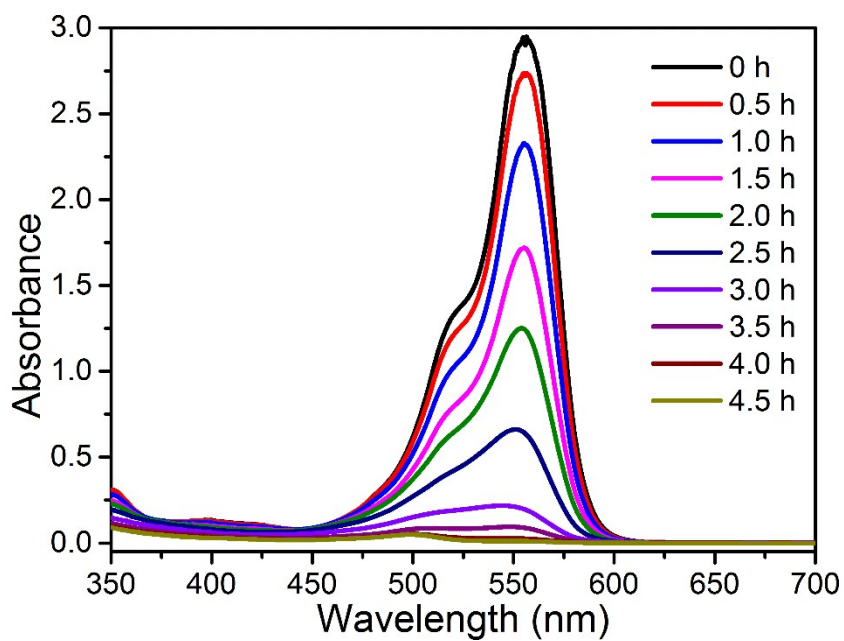

**Fig. S25** UV-Vis absorption spectra during the photodegradation of rhodamine B in aqueous solution (pH = 1) over 3D-T4-SnOS under visible light irradiation.

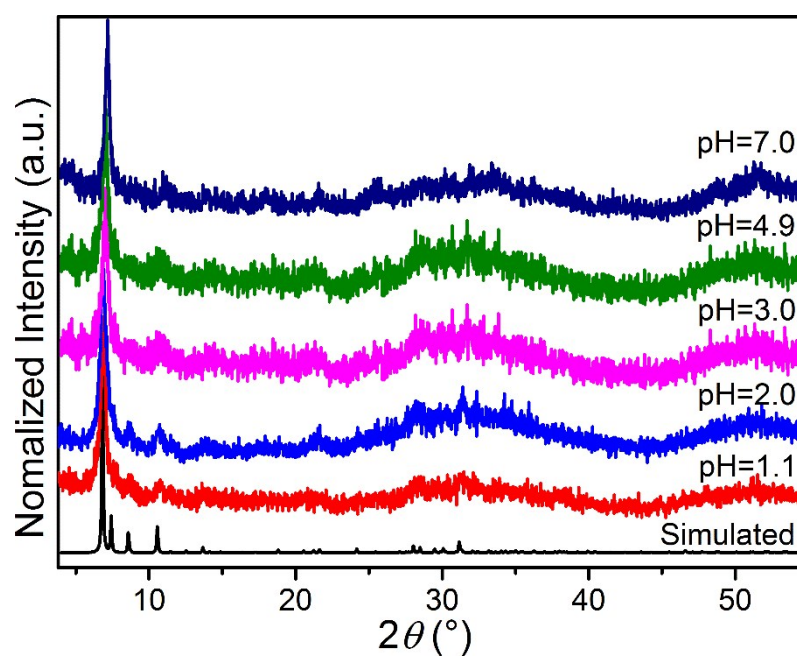

**Fig. S26** PXRD patterns of 3D-T4-SnOS after photodegradation reactions.

---

## Section S10: References

- [1] J. B. Parise, Y Ko, K. Tan, D. M. Nellis and S. Koch, *J. Solid State Chem.*, 1995, **117**, 219-228.
- [2] G. M. Sheldrick, Program for Crystal Structure Solution (University of Göttingen: Göttingen, Germany, 1997); SHELXT-Integrated Space-Group and Crystal-Structure Determination, *Acta Cryst.*, 2015, **A71**, 3-8; O. V. Dolomanov, L. J. Bourhis, R. J. Gildea, J. A. K. Howard and H. Puschmann, OLEX2: A complete structure solution, refinement and analysis program, *J. Appl. Cryst.*, 2009, **42**, 339-341.
